# Supplementary material for: A colorless, transparent and mechanically robust polyurethane elastomer: synthesis, chemical resistance and adhesive properties
Source: Royal Society of Chemistry journal article supplement (doi:10.1039/d1nj05874f), 2022-01-01
Supplement: d1nj05874f1.pdf [file d1nj05874f1.pdf]

## Supporting Information

### **A colorless, transparent and mechanically robust polyurethane elastomer: synthesis, chemical resistance and the adhesive properties**

Huijuan Zhang<sup>1,\*</sup>, Li An<sup>1</sup>, Xue Wang<sup>1</sup>, Chao Niu<sup>1</sup>, Xinjuan Hou<sup>2,3\*</sup>

*1 College of Chemistry and Materials Engineering, Beijing Technology and Business University, Beijing 100048, People's Republic of China. E-mail: zhanghuijuan@btbu.edu.cn.*

*2 CAS Key Laboratory of Green Process and Engineering, National Engineering Laboratory for Hydrometallurgical Cleaner Production Technology, Institute of Process Engineering, Chinese Academy of Sciences, Beijing 100090, China. E-mail: xjhou@home.ipe.ac.cn.*

*3 School of Chemical Engineering, University of Chinese Academy of Sciences, Beijing 100049, China.*

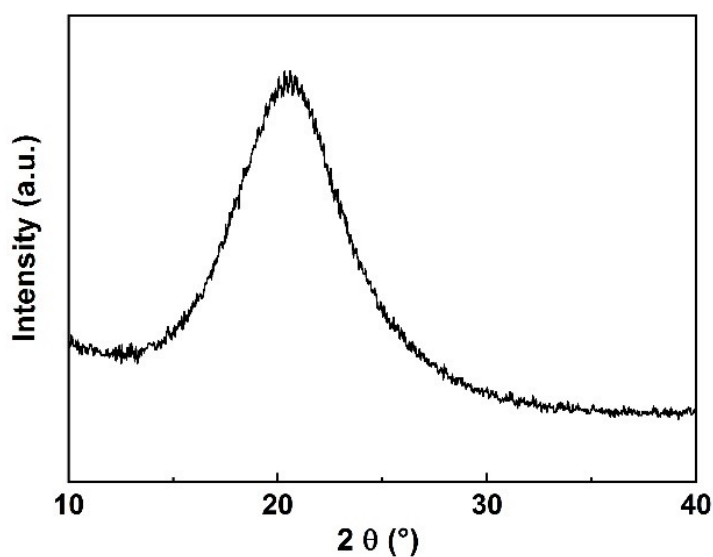

**Fig. S1.** WAXD of XDI-PUE.

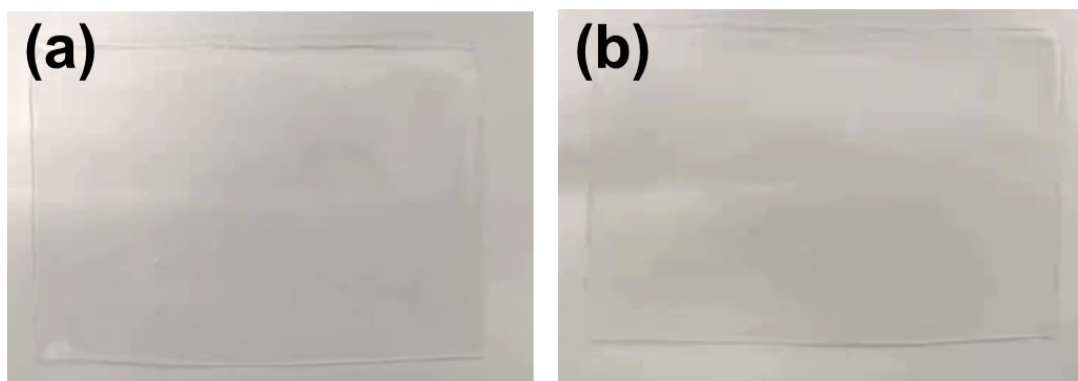

**Fig. S2.** Photographs of XDI-PUE under UV-light. (a) Origin, (b) After 24 h.

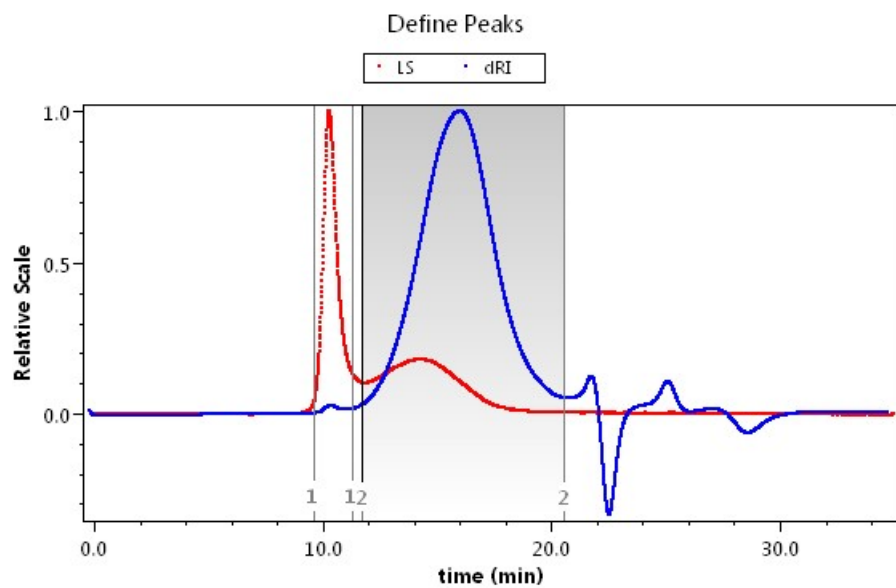

Fig. S3. GPC curve of XDI-PUE.

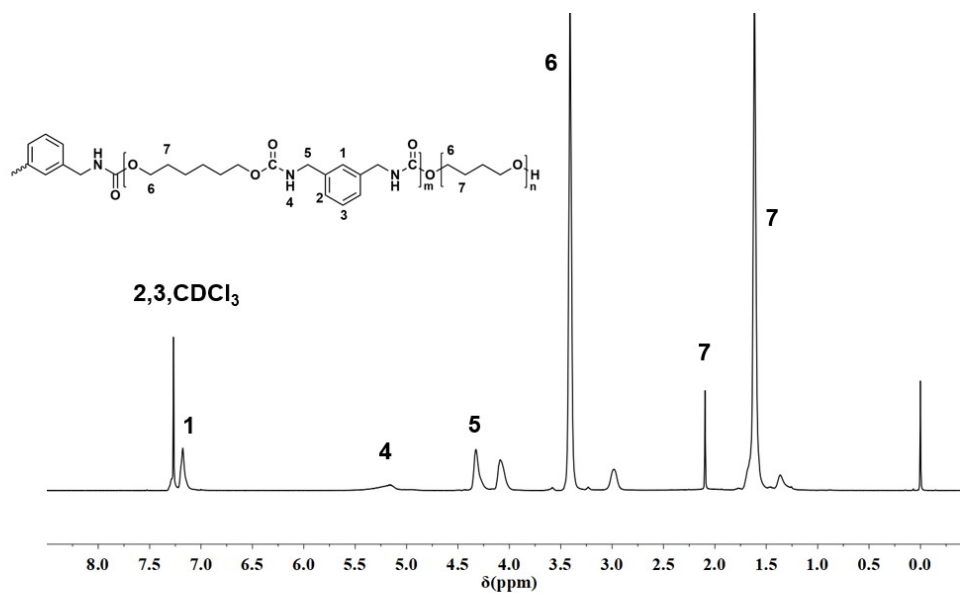

Fig. S4. <sup>1</sup>H NMR spectrum of XDI-PUE.

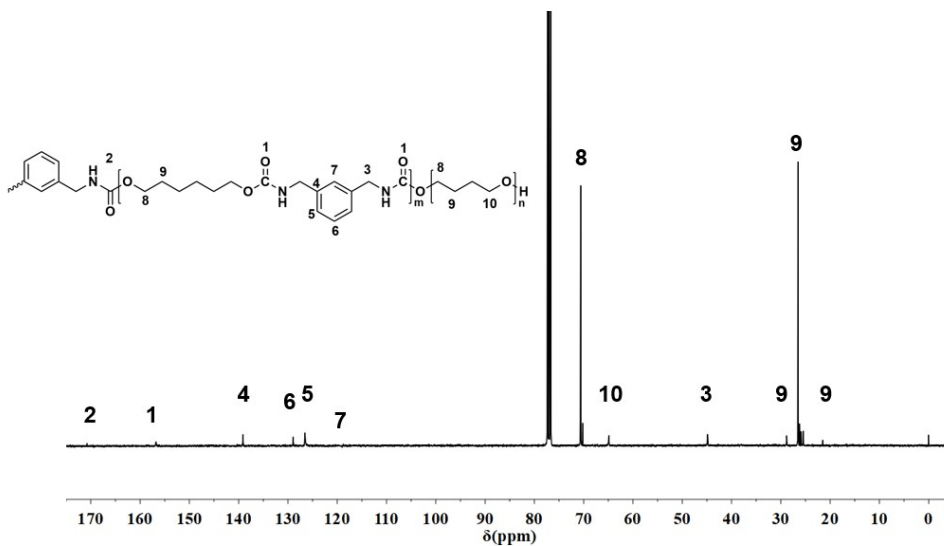

Fig. S5.  $^{13}\text{C}$  NMR spectrum of XDI-PUE.

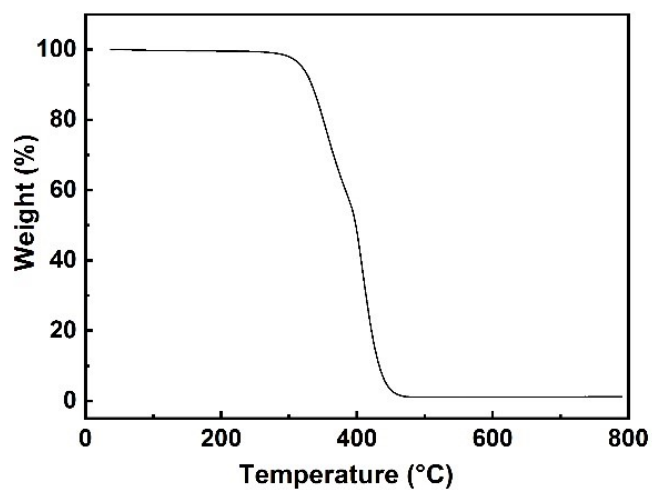

Fig. S6. TGA curve of XDI-PUE.

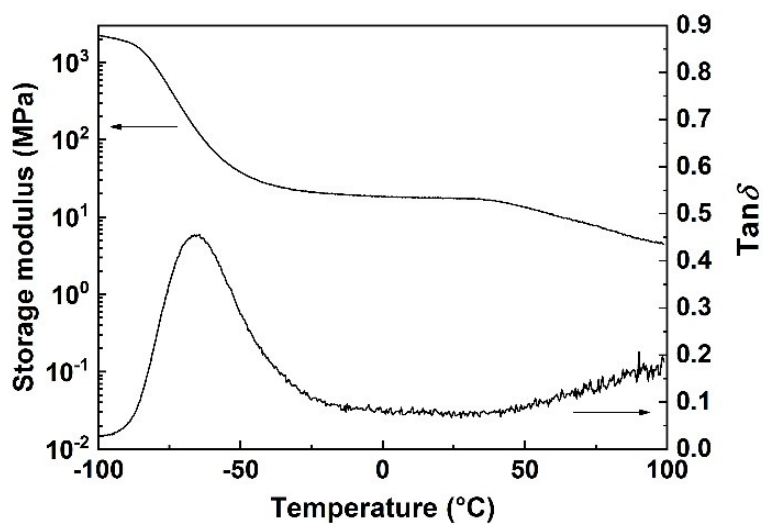

Fig. S7. DMA curve of XDI-PUE.
